# Supplementary material for: Impact of Fermentable Fibres on the Colonic Microbiota Metabolism of Dietary Polyphenols Rutin and Quercetin
Source: PubMed Central journal article supplement (PMC6352267; doi:10.3390/ijerph16020292), 2019-01-21
Supplement: ijerph-16-00292-s001.pdf [file ijerph-16-00292-s001.pdf]

Table S1. PA production during rutin incubation in in vitro fecal batch cultures for each participant.

|                             | V-3  | V-4  | V-5   | V-6  | V-7  | V-8   | V-9  | V-10 | V-11 | V-12  |
|-----------------------------|------|------|-------|------|------|-------|------|------|------|-------|
| <b>4-OHBA (µg/mL)</b>       |      |      |       |      |      |       |      |      |      |       |
| R-0 h                       |      | 0.00 | 0.00  |      |      |       |      |      |      |       |
| R-2 h                       |      | 0.06 | 0.00  |      |      |       |      |      |      |       |
| R-6 h                       |      | 0.06 | 0.00  |      |      |       |      |      |      |       |
| R-24 h                      |      | 0.05 | 0.02  |      |      |       |      |      |      |       |
| <b>PAA (µg/mL)</b>          |      |      |       |      |      |       |      |      |      |       |
| R-0 h                       | 0.57 | 0.15 | 0.35  | 0.15 | 0.40 | 0.79  | 0.29 | 0.23 | 0.42 | 0.00  |
| R-2 h                       | 0.67 | 0.73 | 0.87  | 0.58 | 0.38 | 0.57  | 0.43 | 1.22 | 1.90 | 2.63  |
| R-6 h                       | 1.07 | 0.47 | 1.56  | 0.42 | 0.64 | 1.03  | 1.56 | 5.66 | 5.08 | 1.66  |
| R-24 h                      | 4.64 | 2.37 | 11.62 | 3.59 | 1.25 | 4.16  | 6.31 | 4.94 | 6.27 | 10.83 |
| <b>3-OHPAA (µg/mL)</b>      |      |      |       |      |      |       |      |      |      |       |
| R-0 h                       | 0.00 | 0.00 | 0.00  | 0.00 | 0.00 | 0.00  | 0.00 | 0.00 | 0.00 | 0.00  |
| R-2 h                       | 0.00 | 0.00 | 0.00  | 0.00 | 0.00 | 0.00  | 0.00 | 0.00 | 0.00 | 0.00  |
| R-6 h                       | 0.00 | 0.00 | 0.10  | 0.20 | 0.04 | 0.00  | 0.00 | 0.09 | 0.06 | 0.09  |
| R-24 h                      | 0.06 | 0.08 | 0.52  | 2.40 | 0.07 | 0.00  | 1.89 | 0.54 | 1.97 | 5.03  |
| <b>4-OHPAA (µg/mL)</b>      |      |      |       |      |      |       |      |      |      |       |
| R-0 h                       | 0.08 | 0.04 | 0.00  | 0.01 | 0.07 | 0.28  | 0.04 | 0.08 | 0.12 | 0.84  |
| R-2 h                       | 0.21 | 0.18 | 0.15  | 0.14 | 0.22 | 0.21  | 0.19 | 1.97 | 2.13 | 2.41  |
| R-6 h                       | 0.50 | 0.08 | 0.23  | 0.12 | 0.25 | 0.74  | 0.20 | 0.69 | 1.79 | 1.72  |
| R-24 h                      | 0.49 | 2.18 | 0.65  | 0.22 | 0.55 | 1.18  | 0.10 | 0.11 | 1.30 | 1.16  |
| <b>3,4- diOHPAA (µg/mL)</b> |      |      |       |      |      |       |      |      |      |       |
| R-0 h                       | 0.00 | 0.00 | 0.00  | 0.00 | 0.00 | 0.00  | 0.00 | 0.00 | 0.00 | 0.00  |
| R-2 h                       | 0.44 | 0.14 | 0.19  | 0.24 | 0.36 | 0.32  | 1.69 | 1.15 | 1.13 | 1.37  |
| R-6 h                       | 1.68 | 0.01 | 1.53  | 3.15 | 0.82 | 4.15  | 4.75 | 2.51 | 2.11 | 8.90  |
| R-24 h                      | 5.27 | 0.46 | 7.31  | 0.32 | 5.24 | 12.36 | 0.02 | 0.08 | 0.02 | 0.03  |
| <b>3-OHPPA (µg/mL)</b>      |      |      |       |      |      |       |      |      |      |       |
| R-0 h                       | 0.10 | 0.02 | 0.00  | 0.31 | 0.16 | 0.38  | 0.30 | 0.06 | 0.27 | 0.59  |
| R-2 h                       | 0.18 | 0.22 | 0.26  | 0.70 | 0.32 | 0.27  | 0.42 | 0.20 | 0.52 | 0.37  |
| R-6 h                       | 0.23 | 0.03 | 0.23  | 0.28 | 0.21 | 0.50  | 0.67 | 1.08 | 1.54 | 0.72  |
| R-24 h                      | 0.23 | 0.05 | 0.77  | 0.40 | 0.56 | 0.79  | 0.37 | 0.10 | 0.27 | 0.78  |
| <b>4-OHPPA (µg/mL)</b>      |      |      |       |      |      |       |      |      |      |       |
| R-0 h                       | 0.00 | 0.00 | 0.00  | 0.06 | 0.00 | 0.15  | 0.00 | 0.00 | 0.00 | 0.00  |
| R-2 h                       | 0.08 | 0.00 | 0.18  | 0.30 | 0.18 | 0.18  | 0.20 | 0.24 | 0.80 | 0.76  |
| R-6 h                       | 0.00 | 0.00 | 0.43  | 0.07 | 0.09 | 0.27  | 1.01 | 0.24 | 1.88 | 0.27  |
| R-24 h                      | 0.00 | 0.33 | 0.09  | 0.13 | 0.58 | 2.27  | 0.06 | 0.02 | 0.04 | 0.37  |

Values are mean of duplicate measurements at 0, 2, 6 and 24 h for rutin only incubations. R: rutin, h: hour.
